# Supplementary material
Source: Springer Nature journal article supplement (https://www.springermedizin.de/resource/supplementary/12913_2012_2756_MOESM4_ESM.pdf/9531346)
Supplement: MOESM4 [file 9531346]

**Randomized<sup>1,2</sup>**  
N=10 Sites (110 patients)

**Diabetes Decision Aid**  
**(usual care comparator for Statin Decision Aid)<sup>3</sup>**

(N=5 Sites)

Enrolled patients = 27 DA/38 UC (2 DA & UC)

Median per site: 10 (range 3, 28)

Decline = 65 Median per site: 7 (range 1, 43)

Reason: Unable to reach (48)

Not interested (10)

Other (5)

**Evaluable for analysis: N=65 (27 DA)**

Missing follow-up: n (DA)

Patient Baseline Survey – 1 (0)

Clinician Survey – 1 (1)

Patient 3 month survey – 13 (7)

Patient 6 month survey – 14 (8)

**Statin Decision Aid**  
**(usual care comparator for Diabetes Usual Care)<sup>4</sup>**

(N=5 Sites)

Enrolled patients= 26 DA/14 UC (2 DA & UC)

Median per site: 2 (range 2, 28)

Declined = 32 Median per site: 4 (range 1, 17)

Reason: Unable to reach (11)

Not interested (19)

Other (2)

**Evaluable for analysis: N=39 (26 DA)**

Missing follow-up: n (DA)

Patient Baseline Survey – 3 (1)

Clinician Survey – 7 (4)

Patient 3 month survey – 12 (8)

Patient 6 month survey – 11 (7)

DA = decision aid; UC = usual care

1 – All sites assessed for eligibility agreed to participate and were randomized; none withdrew.

2 – 2 patients removed after aspirin arm of trial was dropped from study.

3 – 2 patients enrolled in both arms were excluded from analysis

4 – 2 patients enrolled in both arms were excluded from analysis (1 is a post randomization exclusion) and 1 UC patient was incorrectly enrolled.
